# Supplementary material for: Comprehensive transcriptomic analysis shows disturbed calcium homeostasis and deregulation of T lymphocyte apoptosis in inclusion body myositis
Source: PubMed Central journal article supplement (PMC9293871; doi:10.1007/s00415-022-11029-7), 2022-03-02
Supplement: 415_2022_11029_MOESM1_ESM.pdf [file 415_2022_11029_MOESM1_ESM.pdf]

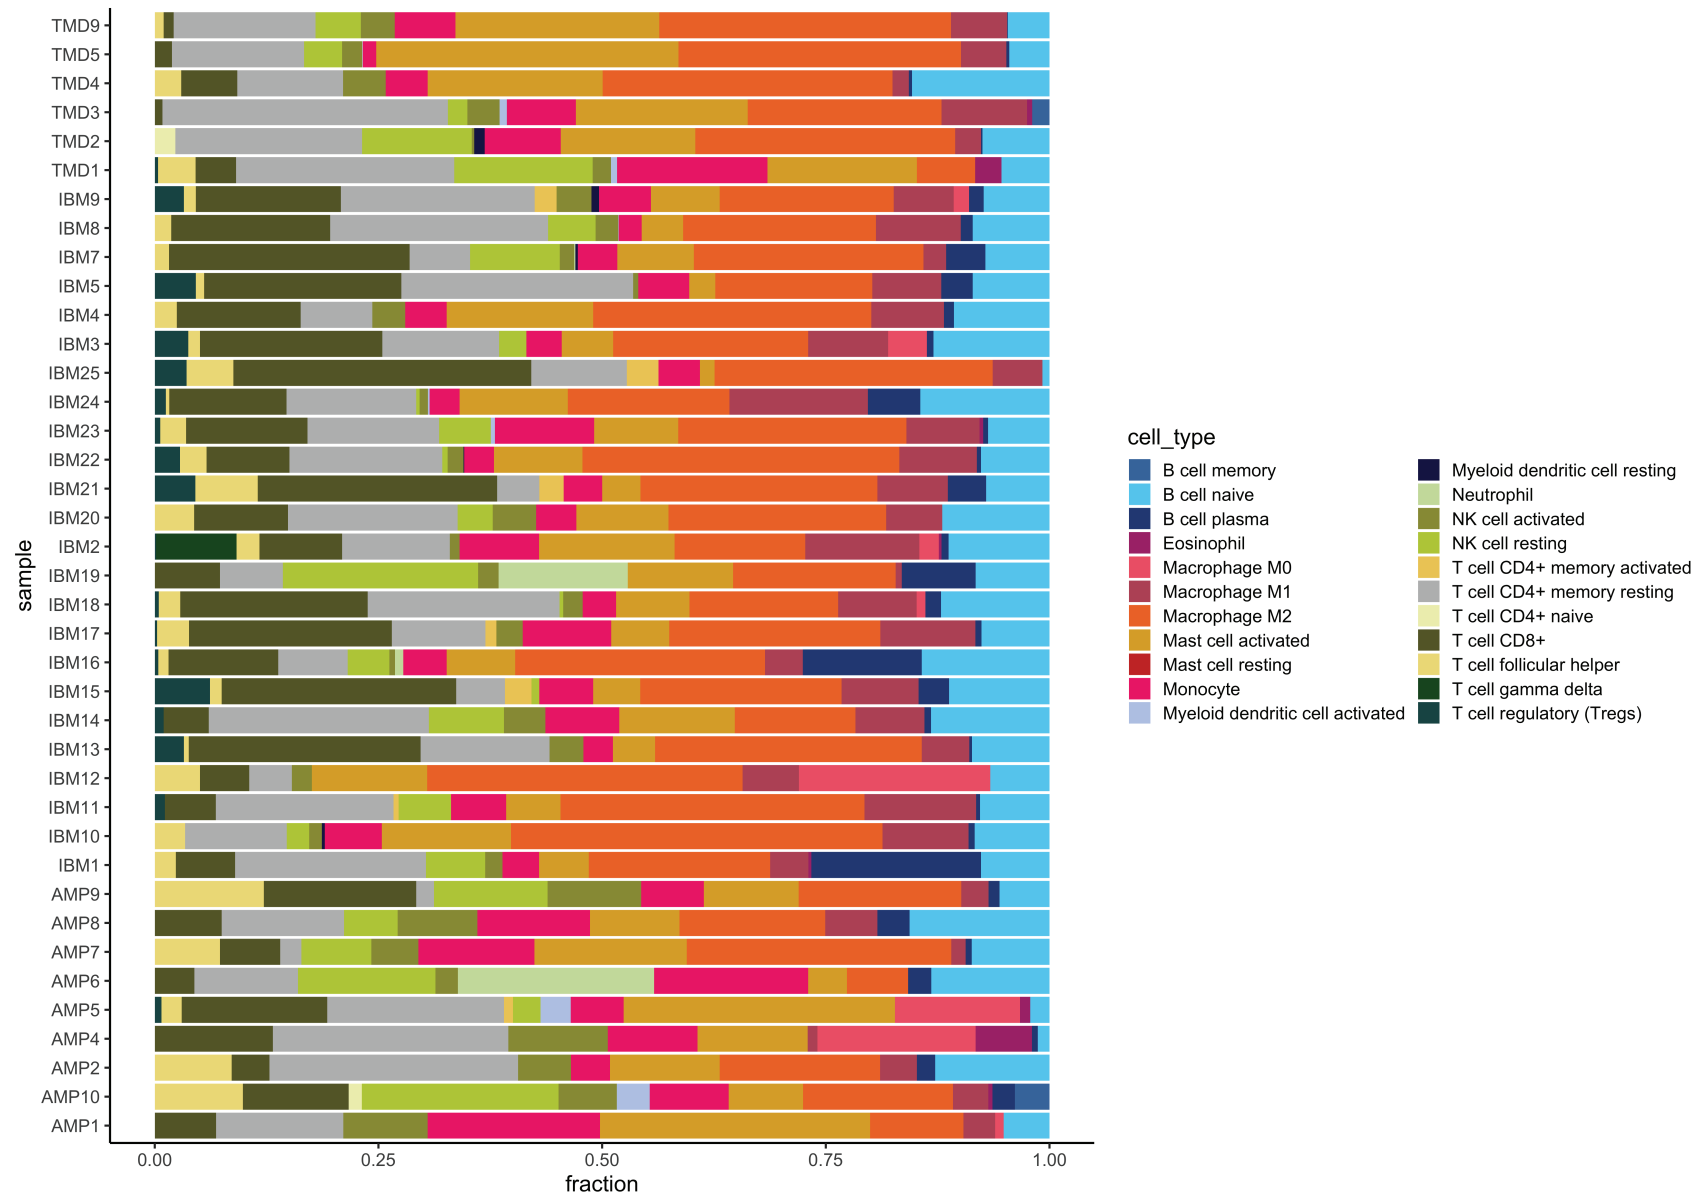

### Supplementary Figure 1: Estimation of immune cell fraction

Estimation of immune cell fraction using Immunedecconv and CIBERSORT in individual samples of the three cohorts: IBM, TMD and Amputees. Twenty-two different immune cell types are represented with respective colors as shown in the legend.

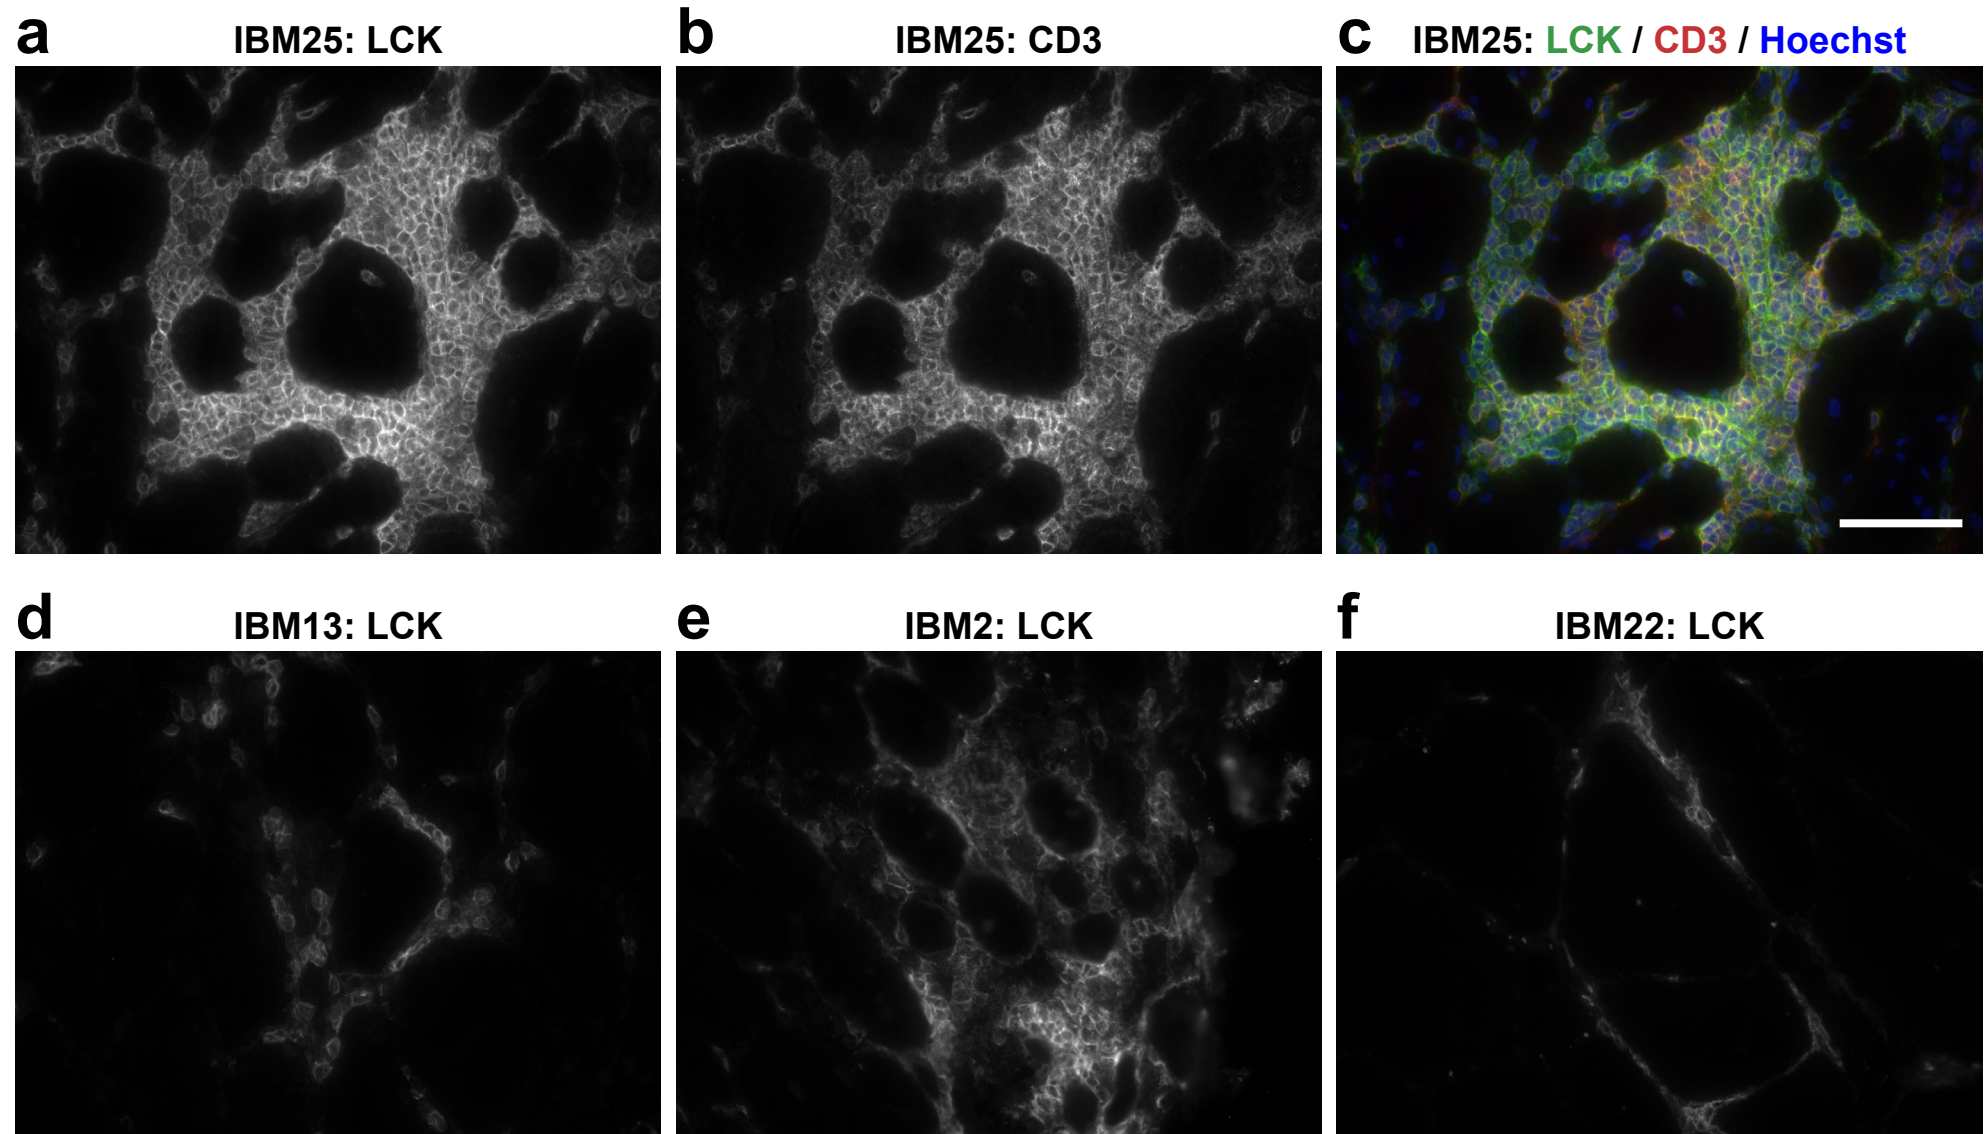

### Supplementary Figure 2

**a–c** Muscle biopsy of IBM25 showing massive inflammatory infiltrate. **(a)** Strong LCK staining is seen in most lymphocytes, which are identified as T-cells by the anti-CD3 antibody **(b)**. The merged image **(c)** shows LCK in green, CD3 in red, Hoechst in blue.

**d–e** A variable number of T-cells expressing LCK are observed in three additional IBM muscle biopsies showing inflammation. Scale bar = 50  $\mu$ m.
